# Supplementary material
Source: Springer Nature journal article supplement (https://www.springermedizin.de/resource/supplementary/12865_2005_81_MOESM5_ESM.pdf/9428468)

## Correlation of qPCR and Flow Cytometric Analysis of OT-1 CD8 +T Cells Diluted into Normal C57BL/6 Spleenocytes

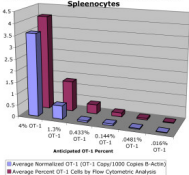

Supplement: MOESM5 [file 9428468]
